# Supplementary material for: Adherence to Mediterranean diet impacts gastrointestinal microbial diversity throughout pregnancy
Source: PubMed Central journal article supplement (PMC8369757; doi:10.1186/s12884-021-04033-8), 2021-08-16

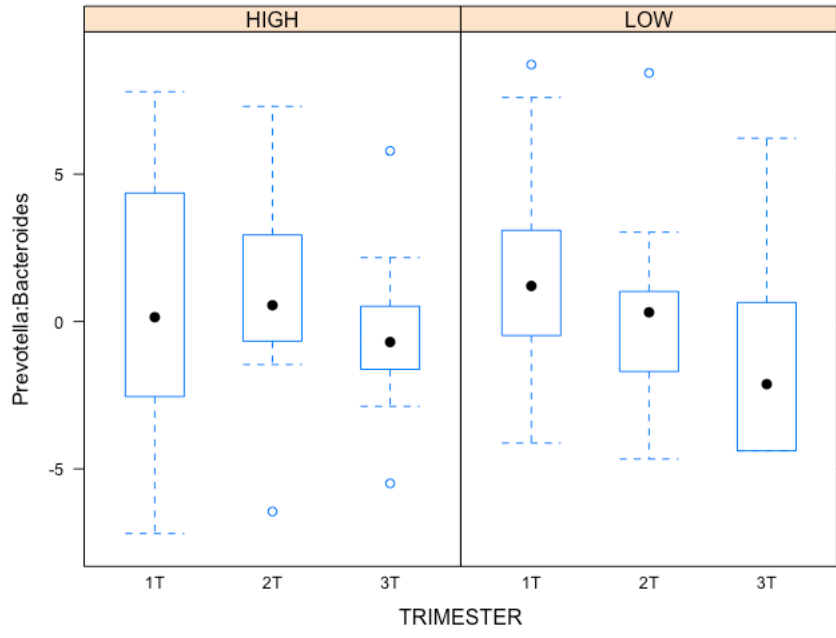

Supplement: 12884_2021_4033_MOESM3_ESM.pdf [file 12884_2021_4033_MOESM3_ESM.pdf]
